# Supplementary material for: The MD-PhD Program in Geneva: A 10-Year Analysis of Graduate Demographics and Outcomes
Source: Research Square preprint supplement (doi:10.21203/rs.3.rs-18323/v2), 2020-10-20
Supplement: Supplementary file 1 [file 3b695eeee56a25e874356f69.docx]

**TABLE 2:** MD-PhD program characteristics for MD-PhD graduates in University of Geneva 2010-2019

| Age at time of MD-PhD graduation, years |  |
| --- | --- |
| Mean (sd) | 32 (4) |
| Median (min-max) | 31 (27 to 46) |
| Field of MD-PhD research |  |
| Basic science | 12 (57.1%) |
| Clinical research | 4 (19.0%) |
| Translational research | 5 (23.8%) |
| MD-PhD training duration, n (%) |  |
| 3 years | 9 (42.9%) |
| 4 years (including 3.5 y) | 7 (33.3%) |
| 5 years | 5 (23.8%) |
| MD-PhD funding, n (%) |  |
| European grant | 1 (4.8%) |
| Grant from host lab / institution | 13 (61.9%) |
| Grant from SAMS* | 6 (28.6%) |
| Grant SCES** | 1 (4.8%) |
| Number of original papers during MD-PhD |  |
| Mean (sd) | 4.9 (4.4) |
| Median (min-max) | 4 (0 to 20) |

*SAMS: Swiss Academy of Medical Sciences **SCES: Swiss Confederation Excellence Scholarship
